# Supplementary material for: Microstructured click hydrogels for cell contact guidance in 3D
Source: PubMed Central journal article supplement (PMC10034521; doi:10.1016/j.mtbio.2023.100604), 2023-03-10
Supplement: mmc1.pdf [file mmc1.pdf]

# SUPPORTING INFORMATION

## MICROSTRUCTURED CLICK HYDROGELS FOR CELL CONTACT GUIDANCE IN 3D

Mariana I. Neves<sup>1,2,3</sup>, Sílvia J. Bidarra<sup>1,2</sup>, Mariana V. Magalhães<sup>1</sup>, Ana L. Torres<sup>1,2</sup>,  
Lorenzo Moroni<sup>4,5</sup>, Cristina C. Barrias<sup>1,2,6,\*</sup>

<sup>1</sup> i3S – Instituto de Investigação e Inovação em Saúde, Universidade do Porto, Portugal

<sup>2</sup> INEB – Instituto de Engenharia Biomédica, Universidade do Porto, Portugal

<sup>3</sup> FEUP – Faculdade de Engenharia, Universidade do Porto, Portugal

<sup>4</sup> MERLN Institute for Technology-Inspired Regenerative Medicine, Maastricht University, Maastricht, the Netherlands

<sup>5</sup> CNR NANOTEC - Institute of Nanotechnology, Università del Salento, Lecce, Italy

<sup>6</sup> ICBAS – Instituto de Ciências Biomédicas Abel Salazar, Universidade do Porto, Portugal

\* corresponding author: [cbarrias@ineb.up.pt](mailto:cbarrias@ineb.up.pt)

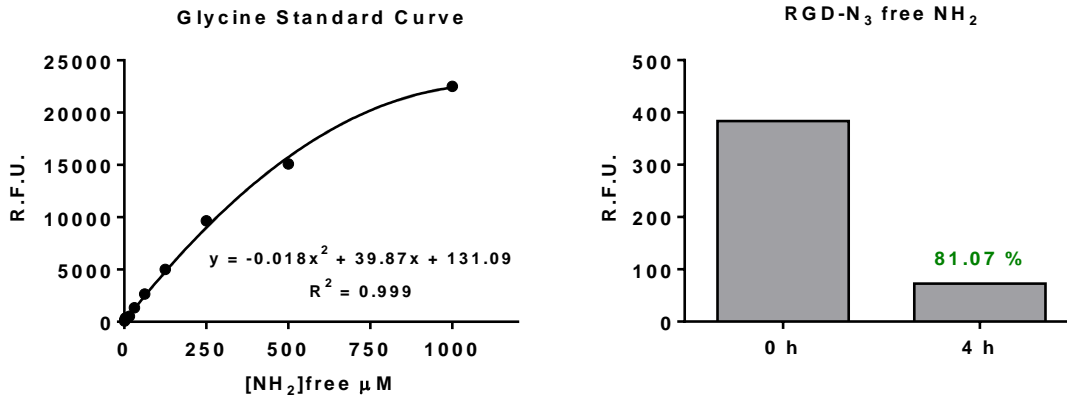

**Figure S1.** Glycine standard curve in fluorescamine assay and reduction of free-amines present in the RGD-containing peptide sequence after azidation reaction.

**Table S1. Sequence of primer pairs for qRT-PCR**

| Gene symbol | Definition                                         | Primer sequence (5'-3')                                |
|-------------|----------------------------------------------------|--------------------------------------------------------|
| GAPDH       | Glyceraldehyde-3-phosphate dehydrogenase           | Fw: AGCCACATCGCTCAGACAC<br>Rev: GCCCAATACGACCAAATCC    |
| ALP         | Alkaline phosphatase                               | Fw: AGAACCCCAAAGGCTTCTTC<br>Rev: CTTGGCTTTTCCTTCATGGT  |
| Runx2       | Run related transcription factor 2                 | Fw: GTGCCTAGGCGCATTTC<br>Rev: GCTCTTCTTACTGAGAGTGGAAGG |
| OCN         | Bone gamma-carboxyglutamate protein or osteocalcin | AGAGTCCAGCAAAGGTGCA<br>TCAGCCAACTCGTCACAGTC            |
| COMP        | Cartilage oligomeric matrix protein                | Fw: GCACCGACGTCAACGAGT<br>Rev: TGGTGTTGATACAGCGGACT    |
| ACAN        | Aggrecan                                           | TAACTGGCGAGCACTGTAAC<br>CAGTGGCCCTGGTACTTGT            |

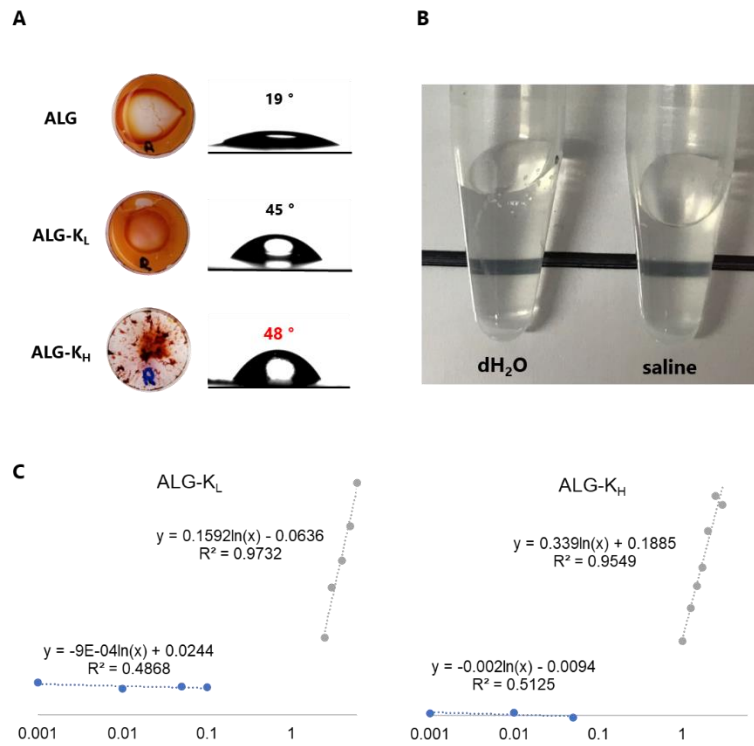

**Figure S2. A)** Safranin staining (orange) of ALG and ALG-K films produced for OCA analysis. ALG and ALG-K<sub>L</sub> produced homogeneous films, evenly coating the coverslip, as opposed to ALG-K<sub>H</sub>. This explains the low OCA differences observed between ALG-K<sub>L</sub> and ALG-K<sub>H</sub>, which retrieved an optical contact angle of 48°. **B)** differences in translucency of ALG-K<sub>H</sub> solutions prepared in dH<sub>2</sub>O or saline solution. **C)** linear transgressions used to determine CAC.

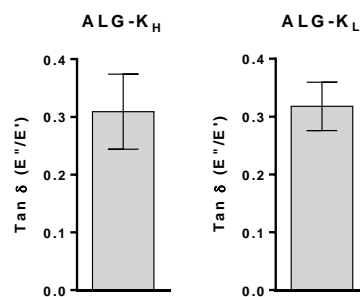

**Figure S3.** Tan  $\delta$  (ratio  $E''/E'$ ) of ALG-K<sub>H</sub> and ALG-K<sub>L</sub> hydrogels showing the proportion between elastic and viscous components is similar between both formulations.

**A**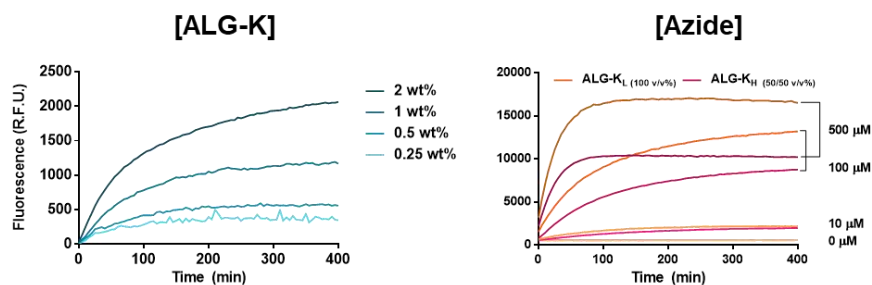**B**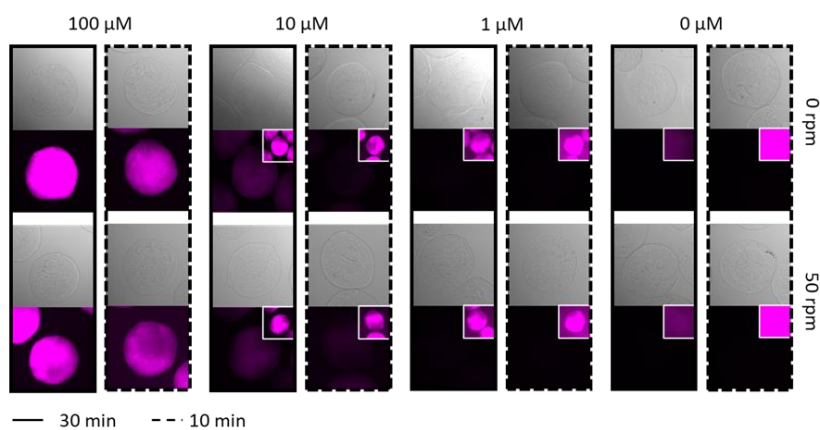

**Figure S4. A)** Effect of polymer concentration (0.25-2.00 wt% ALG-KH and 1 mM Coum-N<sub>3</sub>) and azide-compound concentration (1.5 wt% ALG-KH, 0-500 μM Coum-N<sub>3</sub>) on the kinetics of SPAAC. **B)** Inverted microscopy images of ALG-K<sub>H</sub> microspheres incubated with Cy3-N<sub>3</sub>, showing increase in fluorescence with time and Cy3-N<sub>3</sub> concentration and no significant differences between static and dynamic conditions.

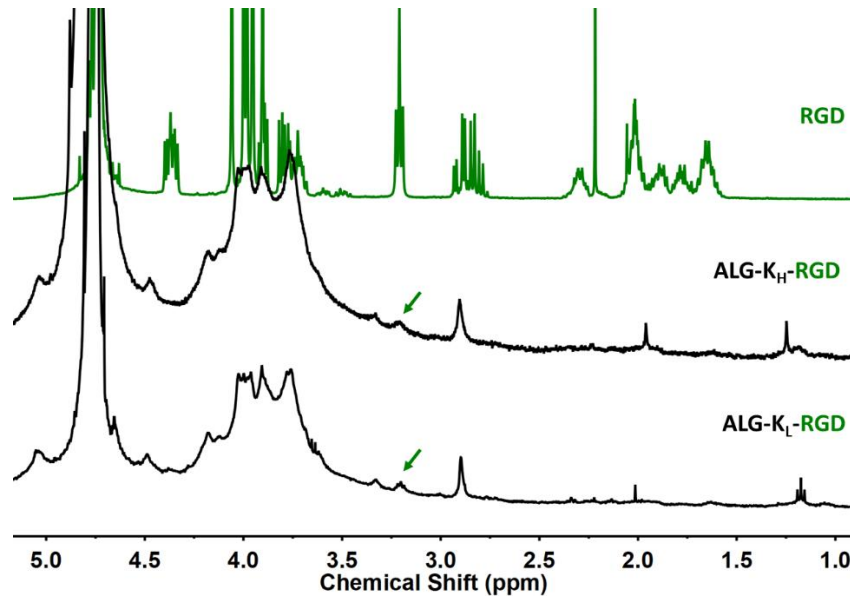

**Figure S5.**  $^1\text{H}$  NMR Spectra of ALG- $\text{K}_\text{H}$  and ALG- $\text{K}_\text{L}$  modified with RGD-N3 peptide (in-sol) reaction. Green arrows show RGD peak ( $\delta = 3.14\text{-}3.25$  ppm) used for RGD-incorporation quantification. ALG-K polymer solutions (2 wt% in 0.9% NaCl) were prepared and mixed with RGD-N3 (final concentration 400  $\mu\text{M}$ ) and allowed to react for 20 h at 20  $^\circ\text{C}$  with agitation. After reaction, the solution was dialyzed against  $\text{dH}_2\text{O}$  using a D-Tube<sup>TM</sup> Dialyzer Maxi (MWCO 3.5 kDa, Milipore), frozen at  $-20$   $^\circ\text{C}$  and freeze-dried.

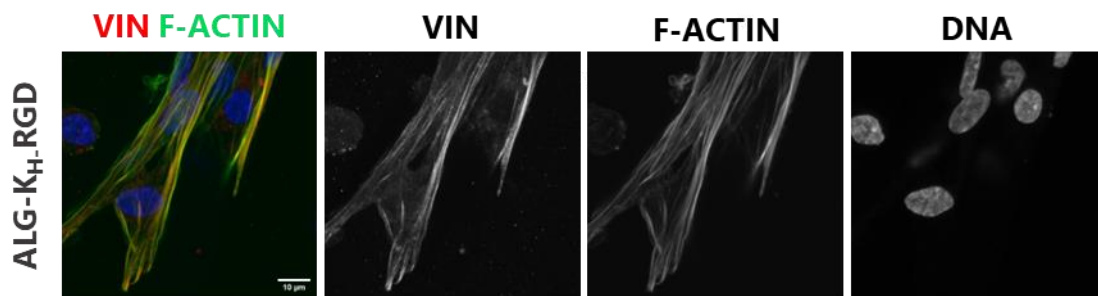

**Figure S6.** Immunostaining of MSCs embedded in ALG- $\text{K}_\text{H}$ -RGD hydrogels showing vinculin accumulation in cell-microstructures contact regions at day 14.
